# Supplementary material for: Adrenergic stimulation of adiponectin secretion in visceral mouse adipocytes is blunted in high-fat diet induced obesity
Source: PubMed Central journal article supplement (PMC6650418; doi:10.1038/s41598-019-47113-8), 2019-07-23
Supplement: 41598_2019_47113_MOESM1_ESM.pdf [file 41598_2019_47113_MOESM1_ESM.pdf]

**Adrenergic stimulation of adiponectin secretion in visceral mouse  
adipocytes is blunted in high-fat diet induced obesity**

Saliha Musovic, Charlotta S Olofsson

Department of Physiology/Metabolic Physiology, Institute of Neuroscience and Physiology, The  
Sahlgrenska Academy at University of Gothenburg, Medicinargatan 11, SE-405 30 Göteborg,  
Sweden

Running title: *Adiponectin secretion in visceral adipocytes*

Word count: 4380

Corresponding author:

Dr Charlotta Olofsson

University of Gothenburg, The Sahlgrenska Academy

Dept. Neuroscience and Physiology, Section of Metabolic Physiology

Postal address: Box 432

SE-405 30 Göteborg, Sweden

ORCID ID: 0000-0001-8824-3151

E-mail: [charlotta.olofsson@gu.se](mailto:charlotta.olofsson@gu.se)

## Supplementary Table 1

| <b>Alias</b>   | <b>Gene symbol</b> | <b>Forward primer 5'-3'</b> | <b>Reverse primer 3'-5'</b> |
|----------------|--------------------|-----------------------------|-----------------------------|
| $\beta$ -actin | <i>Actb</i>        | GACCCAGATCATGTTTGAGA        | GAGCATAGCCCTCGTAGAT         |
| $\alpha_{1D}$  | <i>Adra1d</i>      | AGTGGGTGTCTTCCTAGCC         | GCCTAGAACCTCCATAGTGCC       |
| $\beta_1$      | <i>Adrb1</i>       | CTCATCGTGGTGGGTAACGTG       | ACACACAGCACATCTACCGAA       |
| $\beta_2$      | <i>Adrb2</i>       | GGGAACGACAGCGACTTCTT        | GCCAGGACGATAACCGACAT        |
| $\beta_3$      | <i>Adrb3</i>       | GGCCCTCTCTAGTTCCCAG         | TAGCCATCAAACCTGTTGAGC       |
| Epac1          | <i>Rapgef3</i>     | TCTTACCAGCTAGTGTTGAGC       | AARGCCGATATAGTCGCAGATG      |
| Epac2          | <i>Rapgef4</i>     | CAAGGAGAATGTCCCTTCAGAGA     | GAGCATAGCCCTCGTAGAT         |
| SNAP-23        | <i>SNAP23</i>      | AATCCTGGGTTTAGCCATTGAGTC    | TTGGTCCATGCCTTCTTCTATGC     |
| Stx4           | <i>STX4</i>        | CCCGGACGACGAGTTCTTC         | TTTGATCTCCTCTCGCAGGTT       |
| Stx5           | <i>STX5</i>        | CAAACAAGCAAACCGGCTCTG       | ATCTTCCCAATGCGCCTGG         |
| VAMP2          | <i>VAMP2</i>       | CACAATCTGGTTCTTTGAGGAG      | AGAGACTTCAGGCAGGAATTAG      |
| VAMP4          | <i>VAMP4</i>       | TTCAAGCGCCACCTAAATGAT       | CCAGATGGTCCCCGTAGAAAAA      |
| XBP-1s         | <i>XBP1</i>        | GGTCTGCTGAGTCCGCAGCAGG      | GAAAGGGAGGCTGGTAAGGAAC      |
| BiP            | <i>HSPA5</i>       | CCTCTCTGGTGATCAGGATA        | CGTGGAGAAGATCTGAGACT        |
| ERp44          | <i>ERP44</i>       | TGCGGTCTTCTGTCTTTAGC        | AACGACACCAGTCAGCATAAAA      |
| Ero1-Lalpha    | <i>ERO1A</i>       | TTCTGCCAGGTTAGTGGTTACC      | GTTTGACGGCACAGTCTCTTC       |
| Rap1a          | <i>Rap1a</i>       | ATGCGTGAGTACAAGCTAGTAGT     | AATCTACCTCGACTTGCTTTCTG     |
| Rap1b          | <i>Rap1b</i>       | ATGCGTGAATATAAGCTCGTCG      | GCGAAGCCTTGCCGTTCT          |
| Rab3a          | <i>Rab3a</i>       | GTGGGCAAAACCTCGTTCCT        | TCCTCTTGTCGTTGCGGTAGA       |
